# Supplementary material
Source: PubMed Central journal article supplement (PMC5035698)
Supplement: NIHMS768912-supplement-Supporting_Information.pdf [file NIHMS768912-supplement-Supporting_Information.pdf]

## ***Supporting Information***

### **Experimental results for arginine kinase**

For the 42 kDa protein arginine kinase (AK), it took over a week to measure relaxation parameters by traditional spin relaxation experiments. Here, we aim to acquire data of the same quality in less time using CEST-based experiments. Apo-AK data was recorded at 25°C and pH 6.5 on a Bruker Avance IIIHD 800 MHz instrument equipped with a TXI CryoProbe.  $^{15}\text{N}$  CEST experiments were recorded for two  $B_1$  fields (30 Hz and 60 Hz) as described previously<sup>[1]</sup> with the  $^1\text{H}$  ( $^{15}\text{N}$ ) carrier set to 4.79 (118.3) ppm, a sweep width of 20.0 (26.3) ppm, and accumulation 1536\* (108\*) complex points resulting in an acquisition time of 95.8 (50.6) ms. A total of 67 (45)  $B_1$  offsets over the range of 97 to 137 ppm were used for data acquired with 30 (60) Hz  $B_1$  field strength. A recycle delay of 1.5 sec was used with 4 transients per FID and a CEST mixing time ( $T_{rx}$ ) of 0.8 seconds. Together, the total time required to acquire the two datasets was approximately 39 and 26.5 hours for  $B_1$  fields of 30 and 60 Hz, respectively. Calibration of the  $B_1$  fields was performed as described previously<sup>[1]</sup> using the approach of Guenneugues, *et al.*<sup>[2]</sup> by placing the  $^{15}\text{N}$  carrier on an isolated resonance (here an isolated tryptophan side-chain signal) and incrementing  $T_{rx}$  to obtain an FID. The oscillation frequency, obtained from Fourier transformation or numerical fitting, provides the actual  $B_1$  field value. The 30 (60) Hz  $B_1$  field was determined as  $32.7 \pm 0.2$  ( $64.3 \pm 0.3$ ) Hz. These values are then used in the analysis of the CEST profiles using ChemEx.<sup>[1]</sup>

An increase in  $R_1$  and concomitant decrease in  $R_2$  at the substrate-binding loop L8 (V308-V322) was detected by both types of experiments reflecting large amplitude loop motions as reported previously.<sup>[3]</sup> The largest discrepancy between CEST and regular spin relaxation measurements is observed for  $R_2$  values of certain residues: CEST-derived rates of the three residues R193, T197 and A200 belonging to loop L8 show a substantial increase, which can be attributed to a slow conformational exchange process that may facilitate substrate binding.<sup>[3]</sup> A uniform elevation of  $R_1$  by 5% and a reduction of  $R_2$  by 6% measured by CEST are likely due to a systematic difference in temperature between the two sets of measurements. Despite the small systematic offset in  $R_1$  and  $R_2$ , the  $S^2$

order parameters derived from CEST and the L-MFA method are very similar to the ones derived from regular spin relaxation experiments.

### **NMR data analysis**

All spectra were processed using the NMRPipe suite of programs,<sup>[4]</sup> with intensities extracted for CEST profiles using the nlinLS lineshape fitting algorithm. This is an important step as it fixes lineshape parameters across all CEST planes, improving the accuracy of the extracted intensities even for overlapped and weak resonances. Analysis of the CEST profiles was performed using the ChemEx program (<https://github.com/gbouvignies/chemex>), which numerically integrates the Bloch-McConnell equations<sup>[5]</sup> describing chemical exchange, as explained previously.<sup>[1]</sup> In this work, analysis assuming one- or two-sites (conformational states) was performed on all residues. For single-site analysis (i.e. in the absence of exchange), values of  $k_{ex}$ ,  $p_B$ ,  $\Delta\omega$ , and  $\Delta R_2$  are fixed at 0 while only  $R_1$ ,  $R_2$ , and  $I_0$  (the reference intensity when no saturating  $B_1$  field is applied) are fit for each residue. For two-site exchange, the above fixed values are also fit, with the exception of  $\Delta R_2$ , which is only fit when more than one  $B_1$  field is being analyzed. This is due to a strong correlation between  $k_{ex}$  and  $\Delta R_2$  that cannot be separated with a single  $B_1$  field. By contrast, the fitting of  $R_1$  and  $R_2$  of the ground-state is stable using CEST data at a single  $B_1$  field as is discussed below.

### **Traditional $^{15}\text{N}$ spin relaxation experiments**

Backbone amide  $^{15}\text{N}$   $R_1$  and  $R_{1\rho}$  experiments were acquired according to the in-phase experiments of Lakomek, et al.<sup>[6]</sup> with a small modification to saturate proton signals of the protein while preserving water magnetization following the acquisition of each FID.<sup>[7]</sup> Saturation of protein signals ensures that identical magnetization buildup occurs during each scan, independent of the relaxation mixing time, while preserving the water magnetization minimizes the contribution of amide proton exchange to the relaxation rates. Rates recorded in this fashion with inter-scan delays of 1.5 or 5.0 sec were identical. Ubiquitin data was recorded at 25°C and pH 7.0 on a Bruker Avance IIIHD 850 MHz instrument equipped with a TCI cryoprobe. The  $^1\text{H}$  ( $^{15}\text{N}$ ) carrier set to 4.79 (117.6) ppm, a sweep width of 16.0 (22.0) ppm, and accumulation 1024\* (48\*) complex points

resulting in an acquisition time of 106.5 (35.9) ms. For each experiment, 7 relaxation times were recorded: 40, 240, 640, 800 (x 2), and 1000 (x 2) ms for  $R_1$  and 2, 12, 25 (x 2), 56, 94 (x 2) ms for  $R_{1\rho}$ . The  $B_1$  field used for the  $R_{1\rho}$  experiment was calibrated by measuring the offset-dependence of  $^1J_{\text{NH}}$  couplings in the presence of the spinlock<sup>[8]</sup> and found to be  $1999.2 \pm 1.0$  Hz. Errors in  $R_1$  and  $R_{1\rho}$  were determined using the covariance method of the exponential fits of the data. Values of  $R_2$  were calculated from  $R_{1\rho}$  values according to:

$$R_{1\rho} = R_1 \cos^2(\theta) + R_2 \sin^2(\theta) \quad (1)$$

where  $\theta$  is the tilt angle of the effective magnetic field in the rotating frame,  $\tan(\theta) = \frac{\omega_1}{\Omega}$ ,  $\omega_1$  is the spinlock field strength, and  $\Omega$  is the resonance offset from the spinlock carrier frequency. Errors in  $R_2$  were determined by standard error propagation of  $R_1$ ,  $R_{1\rho}$ , and  $\omega_1$  uncertainties.

The  $R_1$ ,  $R_2$ , NOE data of apo-AK at 800 MHz were taken from the literature.<sup>[3]</sup>

### **Robustness of CEST-derived of $R_1$ and $R_2$ values**

It is well understood that to extract accurate conformational exchange parameters from CEST profiles, multiple  $B_1$  fields are required.<sup>[9]</sup> However, little is known about the accuracy of ground-state relaxation parameters extracted from CEST profiles. While small  $B_1$  fields are usually necessary to observe the minor state dips resulting from exchange processes, these require many more  $B_1$  offsets to acquire a full CEST profile as the offset step-size is typically of the order of the  $B_1$  field itself. Using larger  $B_1$  fields can therefore reduce the experimental time significantly, albeit with broader profiles and thus less sensitivity to exchange. Here, we recorded CEST profiles for ubiquitin at two  $B_1$  fields, 25 and 100 Hz, and explored whether the  $R_1$  and  $R_2$  values extracted using CEST data from one or both  $B_1$  fields is more accurate. Ubiquitin data was recorded at 25°C and pH 7.0 on a Bruker Avance IIIHD 850 MHz instrument equipped with a TCI cryprobe. CEST experiments were recorded as described above for apo-AK, with carrier, sweep width, complex points, and acquisition times of 4.79 (120.8) ppm, 16.0 (18.5) ppm, 1024\* (64\*), and 75.4 (40.2) ms for proton (nitrogen), respectively. The CEST frequency sweep spanned 100 to 140 ppm with 116 offsets (plus a reference) for the  $B_1$  of 25 Hz,

and from 92 to 150 ppm with 41 offsets (plus a reference) for the 100 Hz  $B_1$  field. With a recycle delay of 1.5 sec,  $T_{rlx}$  of 450 ms, and 2 transients per FID, CEST experiments were acquired in approximately 16.6 and 6.0 hours for 25 and 100 Hz  $B_1$  fields, respectively. Calibration of the  $B_1$  fields found values of  $26.3 \pm 0.1$  Hz and  $105.8 \pm 0.5$  Hz, with inhomogeneity of the field determined to be about 10%. From the analysis of these datasets, we found no significant effect on  $R_1$ , whereas  $R_2$  extracted from the larger of the two CEST  $B_1$  fields (100 Hz) shows a better correlation ( $R = 0.98$ ) than the one from the smaller  $B_1$  field at 25 Hz ( $R = 0.66$ ) compared to  $R_2$  data measured by regular spin relaxation experiments at 850 MHz magnetic field strength.

### **Sensitivity and robustness analysis of CEST-derived $R_1$ and $R_2$ parameters**

For a more systematic analysis, we generated numerous two-site exchange CEST profiles as a function of  $k_{ex}$ ,  $p_B$ ,  $\Delta\omega$ , and  $\Delta R_2$ , with 0.5% Gaussian intensity noise relative to the reference dataset, and subsequently fit these profiles using ChemEx assuming the absence (“– Exch”) or presence (“+ Exch”) of two-site exchange (Tables S1-S4). Of note, the change in  $R_1$  between the ground and excited states ( $\Delta R_1$ ) is set to  $0 \text{ s}^{-1}$  for all simulations as CEST profiles are largely insensitive to this parameter.<sup>[9b, 10]</sup> Analysis of the simulation results confirms that the extraction of  $R_1$  from CEST data at a single field is highly robust, independent of whether exchange is assumed or not. The largest discrepancies in  $R_1$  occur when large populations of an excited state are present (Table S4). However, in these cases the minor state dip is obvious from the CEST profile and accurate ground-state  $R_1$  values can again be obtained by fitting the exchange contribution.

Qualitatively different results are observed for the extraction of the ground state  $R_2$  value from CEST profiles with several trends being notable. First, when a single-state model is assumed (“– Exch”), larger  $B_1$  fields are required to suppress exchange contributions and obtain accurate  $R_2$  values. This is analogous to  $R_{1\rho}$  experiments where the largest  $B_1$  fields are often used to suppress as much exchange as possible. Second, the use of multiple  $B_1$  fields in single-state fitting does not necessarily improve the accuracy of the extracted  $R_2$  values. However, the inconsistency in the results and poor fitting (reduced  $\chi^2 > 1$ ) can be indicative of the presence of exchange when no significant minor state dip is observed. Third, when the presence of exchange can be identified, either by

poor fitting or an observable minor dip, accurate  $R_2$  values can once again be obtained by including the exchange contribution in the fitting (“+ Exch”). This is true even for single-field fits of the data despite significant uncertainty in the global exchange parameters (not shown). The only exception to this occurs at large values of  $k_{ex}$  (Table S3, 10,000 s<sup>-1</sup>). Here, the error in the extracted  $R_2$  values is relatively large even with a fitting error that is relatively small (reduced  $\chi^2 \approx 1$ ). In these cases, the observed increase in extracted  $R_2$  without a concomitant decrease in  $R_1$  is a signature for residues experiencing exchange when compared with other residues in the protein. Such exchanging residues should be excluded from a subsequent L-MFA analysis.

| $\Delta R_2$ ( $s^{-1}$ )<br>1) | Fitting | $B_I$<br>Fields | $R_I$ ( $s^{-1}$ ) | $\sigma_{R_I}$ | $R_2$ ( $s^{-1}$ ) | $\sigma_{R_2}$ | Red. $\chi^2$ | $\sigma_{\chi^2}$ |
|---------------------------------|---------|-----------------|--------------------|----------------|--------------------|----------------|---------------|-------------------|
| <b>0</b>                        | - Exch  | 25              | 1.546              | 0.011          | 10.61              | 0.15           | 16.9          | 6.1               |
|                                 | - Exch  | 100             | 1.477              | 0.011          | 13.98              | 0.21           | 6.4           | 3.1               |
|                                 | - Exch  | 500             | <b>1.499</b>       | <b>0.011</b>   | <b>10.15</b>       | <b>0.15</b>    | <b>0.8</b>    | <b>0.3</b>        |
|                                 | - Exch  | 25,100          | 1.525              | 0.011          | 11.71              | 0.36           | 15.2          | 4.2               |
|                                 | + Exch  | 25              | <b>1.500</b>       | <b>0.011</b>   | <b>10.03</b>       | <b>0.39</b>    | <b>0.7</b>    | <b>0.2</b>        |
|                                 | + Exch  | 100             | <b>1.501</b>       | <b>0.012</b>   | <b>10.26</b>       | <b>0.66</b>    | <b>0.5</b>    | <b>0.2</b>        |
|                                 | + Exch  | 25,100          | <b>1.500</b>       | <b>0.008</b>   | <b>10.00</b>       | <b>0.14</b>    | <b>0.7</b>    | <b>0.2</b>        |
| <b>10</b>                       | - Exch  | 25              | 1.547              | 0.010          | 10.60              | 0.15           | 17.2          | 5.9               |
|                                 | - Exch  | 100             | 1.478              | 0.012          | 14.08              | 0.22           | 7.0           | 3.2               |
|                                 | - Exch  | 500             | <b>1.498</b>       | <b>0.012</b>   | 10.27              | 0.15           | <b>0.8</b>    | <b>0.3</b>        |
|                                 | - Exch  | 25,100          | 1.526              | 0.011          | 11.80              | 0.39           | 15.9          | 4.3               |
|                                 | + Exch  | 25              | <b>1.500</b>       | <b>0.011</b>   | <b>10.06</b>       | <b>0.43</b>    | <b>0.7</b>    | <b>0.2</b>        |
|                                 | + Exch  | 100             | <b>1.501</b>       | <b>0.012</b>   | <b>10.23</b>       | <b>0.62</b>    | <b>0.6</b>    | <b>0.2</b>        |
|                                 | + Exch  | 25,100          | <b>1.500</b>       | <b>0.008</b>   | <b>10.01</b>       | <b>0.14</b>    | <b>0.7</b>    | <b>0.2</b>        |
| <b>100</b>                      | - Exch  | 25              | 1.556              | 0.011          | 10.56              | 0.16           | 17.1          | 5.8               |
|                                 | - Exch  | 100             | 1.485              | 0.012          | 14.74              | 0.23           | 7.8           | 3.2               |
|                                 | - Exch  | 500             | <b>1.500</b>       | <b>0.012</b>   | 11.07              | 0.17           | <b>0.8</b>    | <b>0.3</b>        |
|                                 | - Exch  | 25,100          | 1.536              | 0.011          | 11.91              | 0.43           | 17.0          | 4.4               |
|                                 | + Exch  | 25              | <b>1.500</b>       | <b>0.011</b>   | <b>10.03</b>       | <b>0.40</b>    | <b>0.8</b>    | <b>0.2</b>        |
|                                 | + Exch  | 100             | <b>1.501</b>       | <b>0.012</b>   | <b>10.09</b>       | <b>0.51</b>    | <b>0.6</b>    | <b>0.2</b>        |
|                                 | + Exch  | 25,100          | <b>1.500</b>       | <b>0.008</b>   | <b>10.00</b>       | <b>0.15</b>    | <b>0.7</b>    | <b>0.2</b>        |
| <b>1000</b>                     | - Exch  | 25              | 1.560              | 0.011          | 10.76              | 0.15           | 5.7           | 2.1               |
|                                 | - Exch  | 100             | 1.551              | 0.012          | 15.74              | 0.28           | 15.5          | 7.5               |
|                                 | - Exch  | 500             | 1.535              | 0.012          | 14.91              | 0.24           | 3.0           | 1.4               |
|                                 | - Exch  | 25,100          | 1.568              | 0.008          | 12.43              | 0.54           | 13.9          | 4.7               |
|                                 | + Exch  | 25              | <b>1.500</b>       | <b>0.013</b>   | <b>10.02</b>       | <b>0.54</b>    | <b>0.8</b>    | <b>0.2</b>        |
|                                 | + Exch  | 100             | <b>1.501</b>       | <b>0.015</b>   | <b>10.00</b>       | <b>0.58</b>    | <b>0.8</b>    | <b>0.3</b>        |
|                                 | + Exch  | 25,100          | <b>1.499</b>       | <b>0.009</b>   | <b>10.00</b>       | <b>0.16</b>    | <b>0.8</b>    | <b>0.2</b>        |

**Table S1.** Monte Carlo CEST simulation results as a function of  $\Delta R_2$ . True values of  $R_I$  and  $R_2$  are  $1.5 s^{-1}$  and  $10.0 s^{-1}$ , respectively. 1000 simulated datasets were produced with  $k_{ex} = 100 s^{-1}$ ,  $p_B = 1.0\%$ ,  $\Delta\omega = 400$  Hz,  $\Delta R_2$  as indicated in the left column, and 0.5% error intensity error (with respect to the reference dataset) for  $B_I$  values of 25, 100, and 500 Hz. Individual  $B_I$  fields, or combinations of  $B_I$  fields, were then fit with ChemEx assuming the absence of conformational exchange (“- Exch” :  $k_{ex} = p_B = \Delta\omega = \Delta R_2 = 0$ , and only  $I_0$ ,  $R_I$ , and  $R_2$  are fit), or the presence of exchange (“+ Exch”), where  $k_{ex}$ ,  $p_B$ ,  $\Delta\omega$ , and  $\Delta R_2$  are also fit. **Bold values** are within error of the true values.

| $\Delta\omega$ (Hz) | Fitting | $B_I$  | $R_I$ ( $s^{-1}$ ) | $\sigma_{R_I}$ | $R_2$ ( $s^{-1}$ ) | $\sigma_{R_2}$ | Red. $\chi^2$ | $\sigma_{\chi^2}$ |
|---------------------|---------|--------|--------------------|----------------|--------------------|----------------|---------------|-------------------|
| <b>Fields</b>       |         |        |                    |                |                    |                |               |                   |
| <b>0</b>            | – Exch  | 25     | <b>1.500</b>       | <b>0.011</b>   | <b>10.00</b>       | <b>0.14</b>    | <b>0.8</b>    | <b>0.3</b>        |
|                     | – Exch  | 100    | <b>1.500</b>       | <b>0.011</b>   | <b>9.99</b>        | <b>0.15</b>    | <b>0.7</b>    | <b>0.3</b>        |
|                     | – Exch  | 500    | <b>1.500</b>       | <b>0.011</b>   | <b>10.01</b>       | <b>0.15</b>    | <b>0.8</b>    | <b>0.3</b>        |
|                     | – Exch  | 25,100 | <b>1.500</b>       | <b>0.008</b>   | <b>9.99</b>        | <b>0.11</b>    | <b>0.8</b>    | <b>0.2</b>        |
|                     | + Exch  | 25     | <b>1.499</b>       | <b>0.011</b>   | <b>9.96</b>        | <b>0.19</b>    | <b>0.9</b>    | <b>0.3</b>        |
|                     | + Exch  | 100    | <b>1.505</b>       | <b>0.011</b>   | <b>9.55</b>        | <b>1.13</b>    | <b>0.8</b>    | <b>0.4</b>        |
|                     | + Exch  | 25,100 | <b>1.497</b>       | <b>0.008</b>   | 10.22              | 0.18           | 1.6           | 0.5               |
| <b>40</b>           | – Exch  | 25     | <b>1.496</b>       | <b>0.011</b>   | 10.60              | 0.15           | <b>0.9</b>    | <b>0.3</b>        |
|                     | – Exch  | 100    | <b>1.500</b>       | <b>0.011</b>   | <b>10.03</b>       | <b>0.16</b>    | <b>0.7</b>    | <b>0.3</b>        |
|                     | – Exch  | 500    | <b>1.500</b>       | <b>0.011</b>   | <b>10.00</b>       | <b>0.15</b>    | <b>0.8</b>    | <b>0.3</b>        |
|                     | – Exch  | 25,100 | <b>1.497</b>       | <b>0.008</b>   | 10.35              | 0.14           | <b>0.9</b>    | <b>0.2</b>        |
|                     | + Exch  | 25     | <b>1.496</b>       | <b>0.011</b>   | <b>10.21</b>       | <b>0.80</b>    | <b>1.0</b>    | <b>0.4</b>        |
|                     | + Exch  | 100    | <b>1.504</b>       | <b>0.011</b>   | <b>9.83</b>        | <b>0.49</b>    | <b>0.7</b>    | <b>0.2</b>        |
|                     | + Exch  | 25,100 | <b>1.494</b>       | <b>0.008</b>   | 10.56              | 0.19           | 1.6           | 0.4               |
| <b>80</b>           | – Exch  | 25     | <b>1.490</b>       | <b>0.011</b>   | 12.37              | 0.17           | 1.9           | 0.7               |
|                     | – Exch  | 100    | <b>1.498</b>       | <b>0.011</b>   | <b>10.16</b>       | <b>0.15</b>    | <b>0.7</b>    | <b>0.3</b>        |
|                     | – Exch  | 500    | <b>1.500</b>       | <b>0.011</b>   | <b>10.01</b>       | <b>0.16</b>    | <b>0.8</b>    | <b>0.3</b>        |
|                     | – Exch  | 25,100 | 1.491              | 0.008          | 11.34              | 0.29           | 2.1           | 0.6               |
|                     | + Exch  | 25     | <b>1.500</b>       | <b>0.011</b>   | <b>10.02</b>       | <b>0.48</b>    | <b>0.9</b>    | <b>0.6</b>        |
|                     | + Exch  | 100    | <b>1.501</b>       | <b>0.010</b>   | <b>9.86</b>        | <b>0.27</b>    | <b>0.7</b>    | <b>0.2</b>        |
|                     | + Exch  | 25,100 | 1.490              | 0.009          | 11.46              | 0.45           | 4.0           | 1.4               |
| <b>200</b>          | – Exch  | 25     | 1.518              | 0.011          | 12.27              | 0.18           | 14.5          | 5.1               |
|                     | – Exch  | 100    | 1.487              | 0.011          | 11.34              | 0.16           | 1.2           | 0.5               |
|                     | – Exch  | 500    | <b>1.499</b>       | <b>0.011</b>   | <b>10.03</b>       | <b>0.15</b>    | <b>0.8</b>    | <b>0.3</b>        |
|                     | – Exch  | 25,100 | 1.502              | 0.009          | 11.79              | 0.17           | 9.6           | 3.1               |
|                     | + Exch  | 25     | <b>1.500</b>       | <b>0.011</b>   | <b>10.01</b>       | <b>0.22</b>    | <b>0.7</b>    | <b>0.2</b>        |
|                     | + Exch  | 100    | <b>1.499</b>       | <b>0.011</b>   | <b>9.98</b>        | <b>0.37</b>    | <b>0.7</b>    | <b>0.4</b>        |
|                     | + Exch  | 25,100 | <b>1.499</b>       | <b>0.008</b>   | <b>10.09</b>       | <b>0.16</b>    | <b>1.1</b>    | <b>0.3</b>        |

**Table S2.** Monte Carlo CEST simulation results as a function of  $\Delta\omega$ . True values of  $R_I$  and  $R_2$  are  $1.5 s^{-1}$  and  $10.0 s^{-1}$ , respectively. 1000 simulated datasets were produced with  $k_{ex} = 100 s^{-1}$ ,  $p_B = 1.0\%$ ,  $\Delta R_2 = 0 s^{-1}$ ,  $\Delta\omega$  as indicated in the left column, and 0.5% error intensity error (with respect to the reference dataset) for  $B_I$  values of 25, 100, and 500 Hz. Individual  $B_I$  fields, or combinations of  $B_I$  fields, were then fit with ChemEx assuming the absence of conformational exchange (“– Exch” :  $k_{ex} = p_B = \Delta\omega = \Delta R_2 = 0$ , and only  $I_0$ ,  $R_I$ , and  $R_2$  are fit), or the presence of exchange (“+ Exch”), where  $k_{ex}$ ,  $p_B$ , and  $\Delta\omega$  are also fit. **Bold values** are within error of the true values. Values for  $\Delta\omega = 400$  Hz can be found in Table S1,  $\Delta R_2 = 0$ .

| $k_{ex}$ (s <sup>-1</sup> ) | Fitting | $B_I$  | $R_I$ (s <sup>-1</sup> ) | $\sigma_{R_I}$ | $R_2$ (s <sup>-1</sup> ) | $\sigma_{R_2}$ | Red. $\chi^2$ | $\sigma_{\chi^2}$ |
|-----------------------------|---------|--------|--------------------------|----------------|--------------------------|----------------|---------------|-------------------|
| <b>Fields</b>               |         |        |                          |                |                          |                |               |                   |
| <b>20</b>                   | - Exch  | 25     | 1.513                    | 0.011          | <b>10.01</b>             | <b>0.14</b>    | 2.4           | 0.9               |
|                             | - Exch  | 100    | <b>1.498</b>             | <b>0.011</b>   | 10.73                    | 0.16           | <b>1.3</b>    | <b>0.7</b>        |
|                             | - Exch  | 500    | <b>1.500</b>             | <b>0.011</b>   | <b>10.04</b>             | <b>0.15</b>    | <b>0.8</b>    | <b>0.3</b>        |
|                             | - Exch  | 25,100 | <b>1.507</b>             | <b>0.008</b>   | 10.31                    | 0.14           | 2.1           | 0.7               |
|                             | + Exch  | 25     | <b>1.500</b>             | <b>0.011</b>   | <b>10.04</b>             | <b>0.20</b>    | <b>0.8</b>    | <b>0.3</b>        |
|                             | + Exch  | 100    | <b>1.500</b>             | <b>0.011</b>   | <b>10.01</b>             | <b>0.20</b>    | <b>0.7</b>    | <b>0.3</b>        |
|                             | + Exch  | 25,100 | <b>1.499</b>             | <b>0.008</b>   | <b>10.02</b>             | <b>0.14</b>    | <b>0.7</b>    | <b>0.2</b>        |
| <b>500</b>                  | - Exch  | 25     | 1.563                    | 0.011          | 15.04                    | 0.21           | 23.2          | 8.4               |
|                             | - Exch  | 100    | 1.407                    | 0.012          | 23.59                    | 0.26           | 11.1          | 4.5               |
|                             | - Exch  | 500    | <b>1.493</b>             | <b>0.011</b>   | 10.67                    | 0.15           | <b>0.9</b>    | <b>0.4</b>        |
|                             | - Exch  | 25,100 | <b>1.518</b>             | <b>0.018</b>   | 17.77                    | 0.90           | 35.0          | 9.8               |
|                             | + Exch  | 25     | <b>1.500</b>             | <b>0.011</b>   | <b>10.00</b>             | <b>0.19</b>    | <b>0.7</b>    | <b>0.2</b>        |
|                             | + Exch  | 100    | <b>1.499</b>             | <b>0.011</b>   | <b>10.01</b>             | <b>0.23</b>    | <b>0.6</b>    | <b>0.2</b>        |
|                             | + Exch  | 25,100 | <b>1.499</b>             | <b>0.008</b>   | <b>9.99</b>              | <b>0.14</b>    | <b>0.6</b>    | <b>0.2</b>        |
| <b>2,500</b>                | - Exch  | 25     | <b>1.504</b>             | <b>0.011</b>   | 23.31                    | 0.28           | 3.7           | 1.3               |
|                             | - Exch  | 100    | 1.431                    | 0.012          | 23.93                    | 0.29           | 4.7           | 2.2               |
|                             | - Exch  | 500    | 1.479                    | 0.011          | 12.25                    | <b>0.17</b>    | <b>1.7</b>    | <b>0.8</b>        |
|                             | - Exch  | 25,100 | 1.474                    | 0.012          | 23.35                    | 0.20           | 10.1          | 3.6               |
|                             | + Exch  | 25     | <b>1.500</b>             | <b>0.012</b>   | <b>9.89</b>              | <b>2.92</b>    | <b>0.9</b>    | <b>0.3</b>        |
|                             | + Exch  | 100    | <b>1.500</b>             | <b>0.012</b>   | <b>9.92</b>              | <b>1.22</b>    | <b>0.8</b>    | <b>0.3</b>        |
|                             | + Exch  | 25,100 | <b>1.500</b>             | <b>0.008</b>   | <b>9.94</b>              | <b>0.82</b>    | <b>0.9</b>    | <b>0.2</b>        |
| <b>10,000</b>               | - Exch  | 25     | <b>1.500</b>             | <b>0.010</b>   | 16.05                    | 0.20           | <b>0.9</b>    | <b>0.3</b>        |
|                             | - Exch  | 100    | <b>1.489</b>             | <b>0.011</b>   | 15.94                    | 0.21           | <b>0.8</b>    | <b>0.3</b>        |
|                             | - Exch  | 500    | 1.476                    | 0.011          | 13.43                    | 0.19           | <b>1.3</b>    | <b>0.6</b>        |
|                             | - Exch  | 25,100 | <b>1.495</b>             | <b>0.008</b>   | 15.99                    | 0.15           | <b>0.9</b>    | <b>0.2</b>        |
|                             | + Exch  | 25     | <b>1.500</b>             | <b>0.011</b>   | <b>13.65</b>             | <b>4.43</b>    | <b>0.8</b>    | <b>0.3</b>        |
|                             | + Exch  | 100    | <b>1.497</b>             | <b>0.014</b>   | <b>11.99</b>             | <b>3.87</b>    | <b>0.7</b>    | <b>0.3</b>        |
|                             | + Exch  | 25,100 | <b>1.499</b>             | <b>0.009</b>   | <b>11.30</b>             | <b>4.09</b>    | <b>0.8</b>    | <b>0.2</b>        |

**Table S3.** Monte Carlo CEST simulation results as a function of  $k_{ex}$ . True values of  $R_I$  and  $R_2$  are 1.5 s<sup>-1</sup> and 10.0 s<sup>-1</sup>, respectively. 1000 simulated datasets were produced with  $p_B = 1.0\%$ ,  $\Delta R_2 = 0$  s<sup>-1</sup>,  $\Delta\omega = 400$  Hz,  $k_{ex}$  as indicated in the left column, and 0.5% error intensity error (with respect to the reference dataset) for  $B_I$  values of 25, 100, and 500 Hz. Individual  $B_I$  fields, or combinations of  $B_I$  fields, were then fit with ChemEx assuming the absence of conformational exchange (“- Exch” :  $k_{ex} = p_B = \Delta\omega = \Delta R_2 = 0$ , and only  $I_0$ ,  $R_I$ , and  $R_2$  are fit), or the presence of exchange (“+ Exch”), where  $k_{ex}$ ,  $p_B$ , and  $\Delta\omega$  are also fit. **Bold values** are within error of the true values. Values for  $k_{ex} = 100$  s<sup>-1</sup> can be found in Table S1,  $\Delta R_2 = 0$ .



| $p_B$ (%)     | Fitting | $B_I$  | $R_I$ ( $s^{-1}$ ) | $\sigma_{R_I}$ | $R_2$ ( $s^{-1}$ ) | $\sigma_{R_2}$ | Red. $\chi^2$ | $\sigma_{\chi^2}$ |
|---------------|---------|--------|--------------------|----------------|--------------------|----------------|---------------|-------------------|
| <b>Fields</b> |         |        |                    |                |                    |                |               |                   |
| <b>0</b>      | – Exch  | 25     | <b>1.500</b>       | <b>0.010</b>   | <b>10.00</b>       | <b>0.14</b>    | <b>0.8</b>    | <b>0.3</b>        |
|               | – Exch  | 100    | <b>1.500</b>       | <b>0.011</b>   | <b>10.01</b>       | <b>0.15</b>    | <b>0.7</b>    | <b>0.3</b>        |
|               | – Exch  | 500    | <b>1.500</b>       | <b>0.011</b>   | <b>10.00</b>       | <b>0.15</b>    | <b>0.8</b>    | <b>0.3</b>        |
|               | – Exch  | 25,100 | <b>1.500</b>       | <b>0.008</b>   | <b>10.00</b>       | <b>0.11</b>    | <b>0.8</b>    | <b>0.2</b>        |
|               | + Exch  | 25     | <b>1.500</b>       | <b>0.003</b>   | <b>10.00</b>       | <b>0.03</b>    | <b>1.0</b>    | <b>0.4</b>        |
|               | + Exch  | 100    | <b>1.500</b>       | <b>0.003</b>   | <b>9.90</b>        | <b>0.92</b>    | <b>0.9</b>    | <b>0.5</b>        |
|               | + Exch  | 25,100 | <b>1.500</b>       | <b>0.003</b>   | <b>9.97</b>        | <b>0.29</b>    | <b>0.9</b>    | <b>0.3</b>        |
| <b>5</b>      | – Exch  | 25     | 1.670              | 0.011          | 13.52              | 0.20           | 150.6         | 53.3              |
|               | – Exch  | 100    | 1.391              | 0.012          | 25.77              | 0.30           | 13.3          | 5.3               |
|               | – Exch  | 500    | <b>1.493</b>       | <b>0.012</b>   | 10.69              | 0.17           | <b>0.9</b>    | <b>0.4</b>        |
|               | – Exch  | 25,100 | 1.569              | 0.032          | 18.08              | 1.48           | 116.2         | 31.4              |
|               | + Exch  | 25     | <b>1.500</b>       | <b>0.011</b>   | <b>10.01</b>       | <b>0.29</b>    | <b>0.7</b>    | <b>0.2</b>        |
|               | + Exch  | 100    | <b>1.500</b>       | <b>0.012</b>   | <b>10.01</b>       | <b>0.43</b>    | <b>0.6</b>    | <b>0.2</b>        |
|               | + Exch  | 25,100 | <b>1.500</b>       | <b>0.008</b>   | <b>10.03</b>       | <b>0.20</b>    | <b>0.6</b>    | <b>0.1</b>        |
| <b>10</b>     | – Exch  | 25     | 1.749              | 0.012          | 18.12              | 0.32           | 260.8         | 87.3              |
|               | – Exch  | 100    | 1.363              | 0.013          | 31.16              | 0.34           | 16.5          | 6.3               |
|               | – Exch  | 500    | <b>1.488</b>       | <b>0.012</b>   | 11.22              | 0.18           | <b>1.1</b>    | <b>0.5</b>        |
|               | – Exch  | 25,100 | 1.575              | 0.049          | 24.89              | 1.97           | 191.8         | 55.5              |
|               | + Exch  | 25     | <b>1.500</b>       | <b>0.012</b>   | <b>10.00</b>       | <b>0.48</b>    | <b>0.7</b>    | <b>0.2</b>        |
|               | + Exch  | 100    | <b>1.500</b>       | <b>0.013</b>   | <b>9.92</b>        | <b>0.74</b>    | <b>0.7</b>    | <b>0.2</b>        |
|               | + Exch  | 25,100 | <b>1.500</b>       | <b>0.009</b>   | <b>10.01</b>       | <b>0.32</b>    | <b>0.7</b>    | <b>0.2</b>        |
| <b>25</b>     | – Exch  | 25     | 1.067              | 0.015          | 257.58             | 2.26           | 193.1         | 68.2              |
|               | – Exch  | 100    | 1.331              | 0.015          | 38.98              | 0.47           | 14.0          | 6.1               |
|               | – Exch  | 500    | 1.480              | 0.014          | 12.19              | 0.22           | <b>1.3</b>    | <b>0.6</b>        |
|               | – Exch  | 25,100 | 1.435              | 0.125          | 63.26              | 36.54          | 207.4         | 60.0              |
|               | + Exch  | 25     | <b>1.499</b>       | <b>0.015</b>   | <b>10.08</b>       | <b>1.29</b>    | <b>0.8</b>    | <b>0.3</b>        |
|               | + Exch  | 100    | <b>1.499</b>       | <b>0.017</b>   | <b>10.08</b>       | <b>1.51</b>    | <b>0.7</b>    | <b>0.3</b>        |
|               | + Exch  | 25,100 | <b>1.499</b>       | <b>0.011</b>   | <b>9.99</b>        | <b>0.58</b>    | <b>0.8</b>    | <b>0.2</b>        |

**Table S4.** Monte Carlo CEST simulation results as a function of  $p_B$ . True values of  $R_I$  and  $R_2$  are  $1.5 s^{-1}$  and  $10.0 s^{-1}$ , respectively. 1000 simulated datasets were produced with  $k_{ex} = 100 s^{-1}$ ,  $\Delta R_2 = 0 s^{-1}$ ,  $\Delta\omega = 400$  Hz,  $p_B$  as indicated in the left column, and 0.5% error intensity error (with respect to the reference dataset) for  $B_I$  values of 25, 100, and 500 Hz. Individual  $B_I$  fields, or combinations of  $B_I$  fields, were then fit with ChemEx assuming the absence of conformational exchange (“– Exch” :  $k_{ex} = p_B = \Delta\omega = \Delta R_2 = 0$ , and only  $I_0$ ,  $R_I$ , and  $R_2$  are fit), or the presence of exchange (“+ Exch”), where  $k_{ex}$ ,  $p_B$ , and  $\Delta\omega$  are also fit. **Bold values** are within error of the true values. Values for  $p_B = 1\%$  can be found in Table S1,  $\Delta R_2 = 0$ .

## **Molecular Dynamics (MD) simulations and back-calculation of relaxation parameters**

Molecular dynamics (MD) simulations were performed using the protocol reported previously<sup>[11]</sup> for 10 proteins with variable size and topologies with their initial 3D structures taken from the PDB (PDB codes 1MJC, 1EKG, 1GNU, 1GST, 1QZM, 1VYK, 2B02, 2END, 1IGD, and 1UBI). From each trajectory  $R_1$ ,  $R_2$  and NOE values were computed following Eqs. 1-7 of Ref.<sup>[11]</sup> Briefly, for each  $^{15}\text{N}$ - $^1\text{H}$  bond vector, the spectral density function  $J(\omega)$  was determined by Fourier transformation of the multi-exponentially decaying reorientational correlation function composed of both the internal correlation function and the overall tumbling correlation function. The relaxation parameters were then calculated as a linear combination of spectral density functions sampled at the Larmor frequencies,  $\omega_N$  and  $\omega_H$ , and their sum and difference:

$$R_1 = 1/T_1 = d_{oo} [3J(\omega_N) + J(\omega_H - \omega_N) + 6J(\omega_N + \omega_N)] + c_{oo} \omega_N^2 J(\omega_N) \quad (2)$$

$$R_2 = 1/T_2 = \frac{1}{2} d_{oo} [4J(0) + 3J(\omega_N) + J(\omega_H - \omega_N) + 6J(\omega_H) + 6J(\omega_N + \omega_H)] + \frac{1}{6} c_{oo} \omega_N^2 [4J(0) + 3J(\omega_N)] \quad (3)$$

where the N-H bond length was set to be 1.02 Å and the  $^{15}\text{N}$  chemical shielding anisotropy (CSA) was set to -160 ppm for model-free fitting of both MD-derived and experimentally measured  $^{15}\text{N}$   $R_1$ ,  $R_2$  and NOE.

## **Lean model-free (L-MFA) and regular model-free analysis (MFA)**

The model-free approach (MFA) and the simplified L-MFA were applied to either the MD-derived or experimentally measured  $R_1$ ,  $R_2$ , and NOE parameters. The difference between MFA and L-MFA is the number of relaxation parameters as input. While at a given  $B_0$  field MFA takes into account all three relaxation parameters, L-MFA uses only the  $R_1$  and  $R_2$  relaxation rates. Both MFA and L-MFA were applied to globular proteins assuming isotropic tumbling. The  $\tau_c$  was fixed at either a predefined or estimated value and two parameters ( $S^2$  and  $\tau_{int}$ ) were fitted to the model described below. Internal motional correlation function  $C_I(t)$  and the corresponding spectral density function  $J(\omega)$  after Fourier transformation are:

$$C_I(t) = S^2 + (1 - S^2) e^{-t/\tau_{int}} \quad (4)$$

$$J(\omega) = S^2 \frac{2\tau_c}{1 + (\omega \tau_c)^2} + (1 - S^2) \frac{2\tau_{eff}}{1 + (\omega \tau_{eff})^2} \quad (5)$$

where  $\tau_{eff} = \tau_c \tau_{int} / (\tau_c + \tau_{int})$ . The generalized order parameters  $S^2$  and  $\tau_{int}$  were obtained by non-linear least square minimization of the target function. Monte Carlo (MC) error analysis was performed by fitting model-free parameters after adding 5% random errors to each relaxation parameter. The error bars were determined as the standard deviations of the fitted order parameters over 30 Monte Carlo simulations. The model-free analysis was performed using in-house MATLAB scripts. The global tumbling correlation time  $\tau_c$  values were estimated as a function of  $\tau_c$  calculated from  $R_2/R_1$  ratio over all  $^{15}\text{N}$  sites that are part of well-defined secondary structures, i.e.  $\alpha$ -helices and  $\beta$ -strands, and hence exhibit only moderate internal dynamics with fast internal correlation times  $\tau_{int}$ . The spectra density function then simplifies to  $J(\omega) = 2S^2\tau_c / (1 + \omega^2 \tau_c^2)$  and  $R_1$  and  $R_2$  parameters are computed with this  $J(\omega)$  using Eqs. 2 - 3. After translating each  $^{15}\text{N}$   $R_2/R_1$  ratio into a residue-wise  $\tau_c$ , a global tumbling correlation time  $\tau_c^{est}$  is obtained from the average of the  $\tau_c$  distribution of residues that are part of well-defined secondary structures, which yields a stable estimate for the global  $\tau_c$  (see Figure S13).

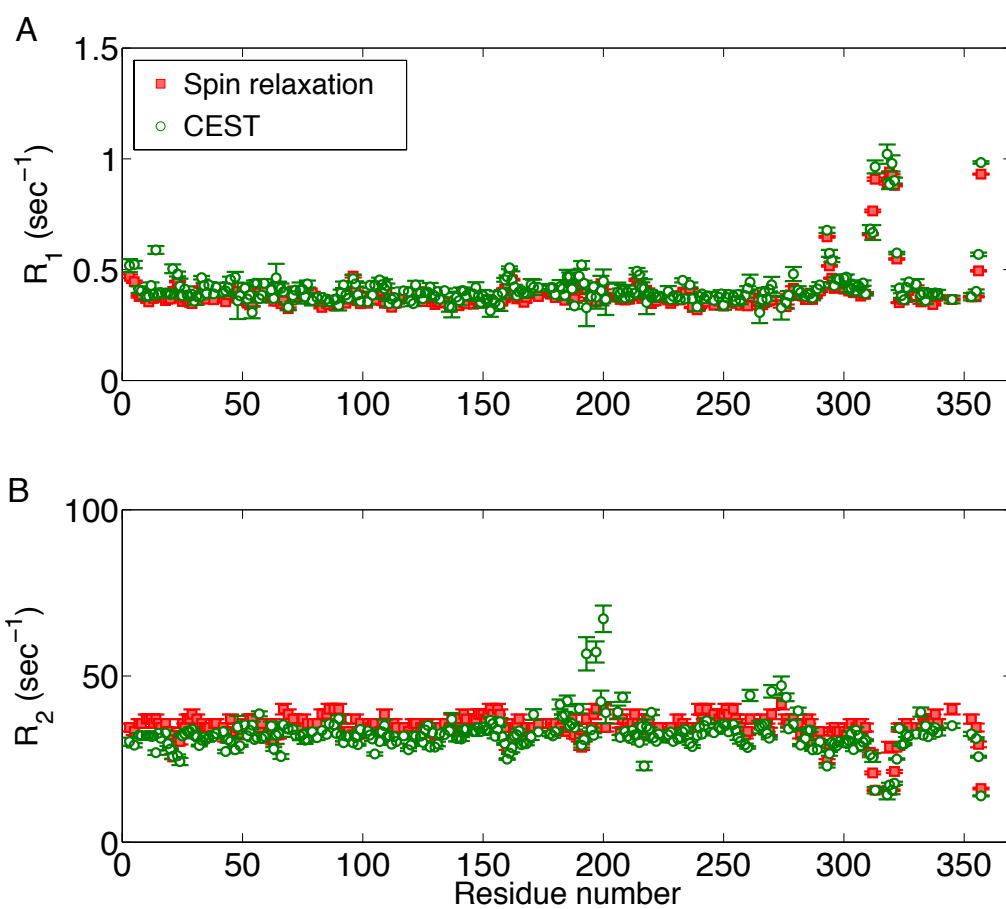

**Figure S1.** Comparison of experimental relaxation parameters (A)  $R_1$  and (B)  $R_2$  of arginine kinase (AK) derived from CEST (green circles) and standard spin relaxation experiments (red squares) at 800 MHz magnetic field strength. A uniform elevation of  $R_1$  by 5% and a reduction of  $R_2$  by 6% measured by CEST are likely due to a small difference in temperature between the two sets of measurements.

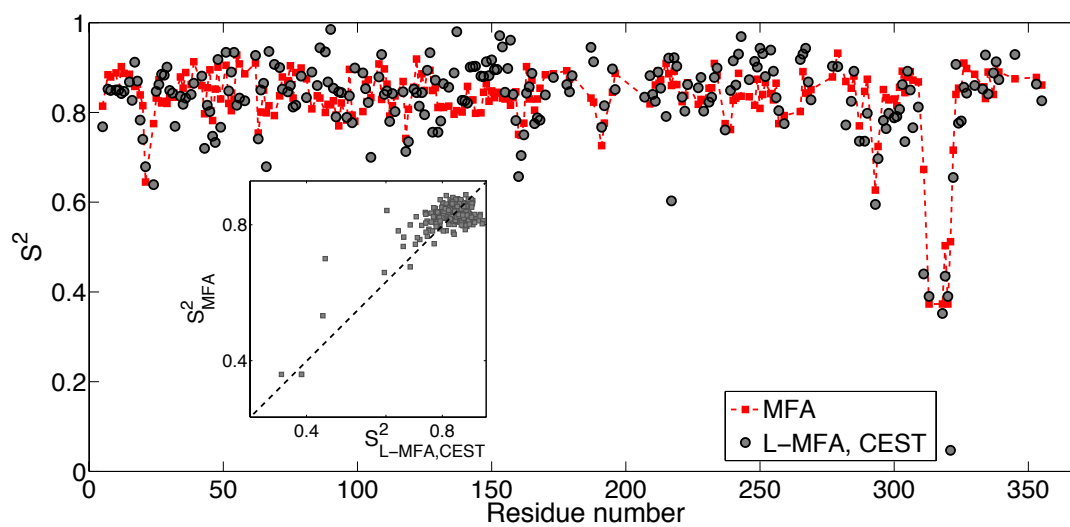

**Figure S2.** Comparison of AK order parameters  $S^2_{\text{LMFA}}$  determined from CEST-derived  $R_1$ ,  $R_2$  values (black circles) and previously reported  $S^2_{\text{MFA}}$  determined from  $R_1$ ,  $R_2$  and NOE data of standard spin relaxation experiments (red squares). The inset shows a correlation plot for the two types of order parameters.

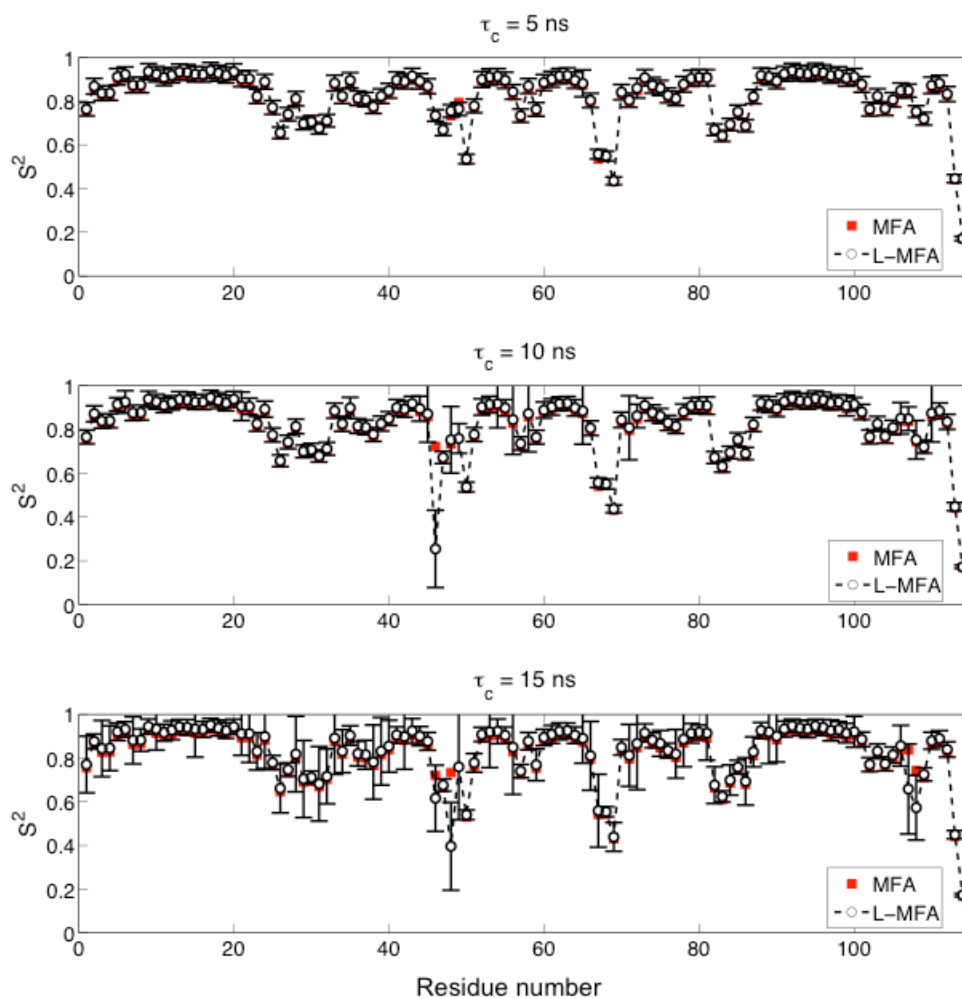

**Figure S3.** Comparison of  $S^2$  order parameters determined by MFA and L-MFA methods with different  $\tau_c$  values of 5 ns, 10 ns and 15 ns (from top to bottom). The error bars were estimated by Monte Carlo simulations with 5% errors for  $R_1$  and  $R_2$  values extracted from the MD trajectory (PDB: 1EKG).

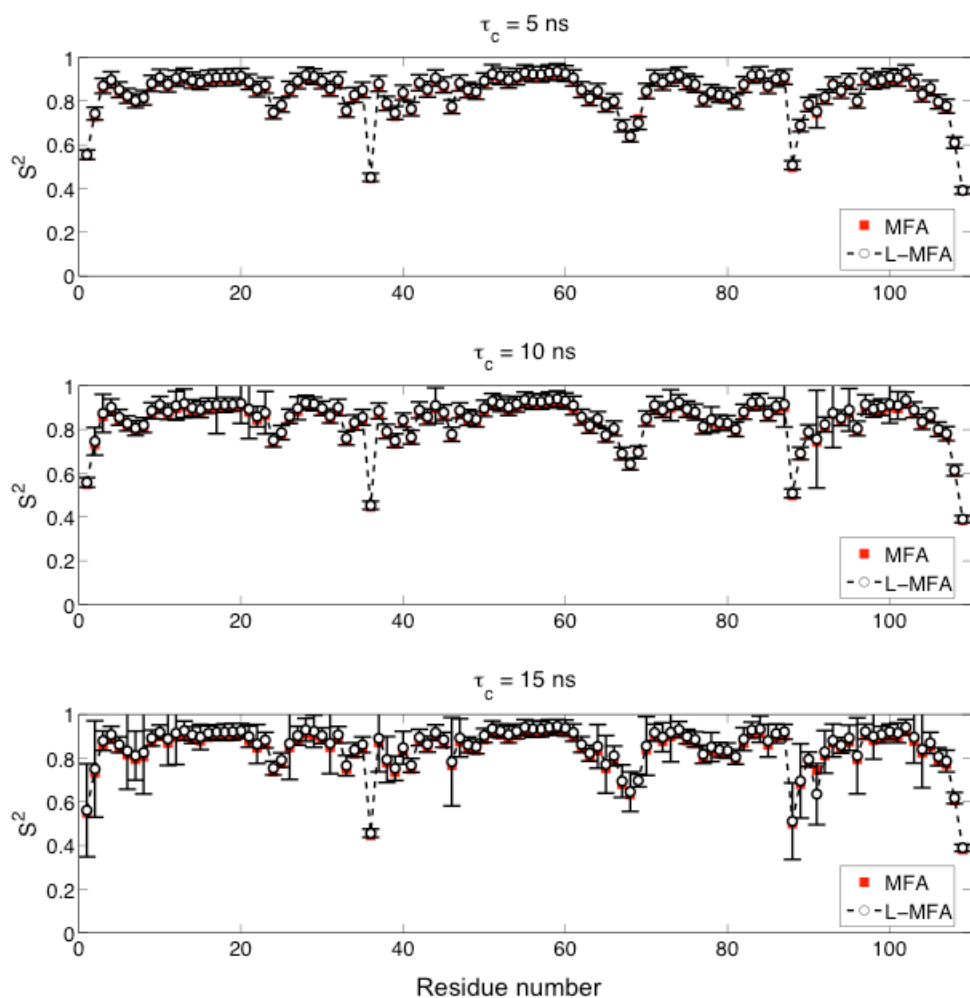

**Figure S4.** Comparison of  $S^2$  order parameters determined by MFA and L-MFA methods with different  $\tau_c$  values of 5 ns, 10 ns and 15 ns (from top to bottom). The error bars were estimated by Monte Carlo simulations with 5% errors for  $R_1$  and  $R_2$  values extracted from the MD trajectory (PDB: 1GNU).

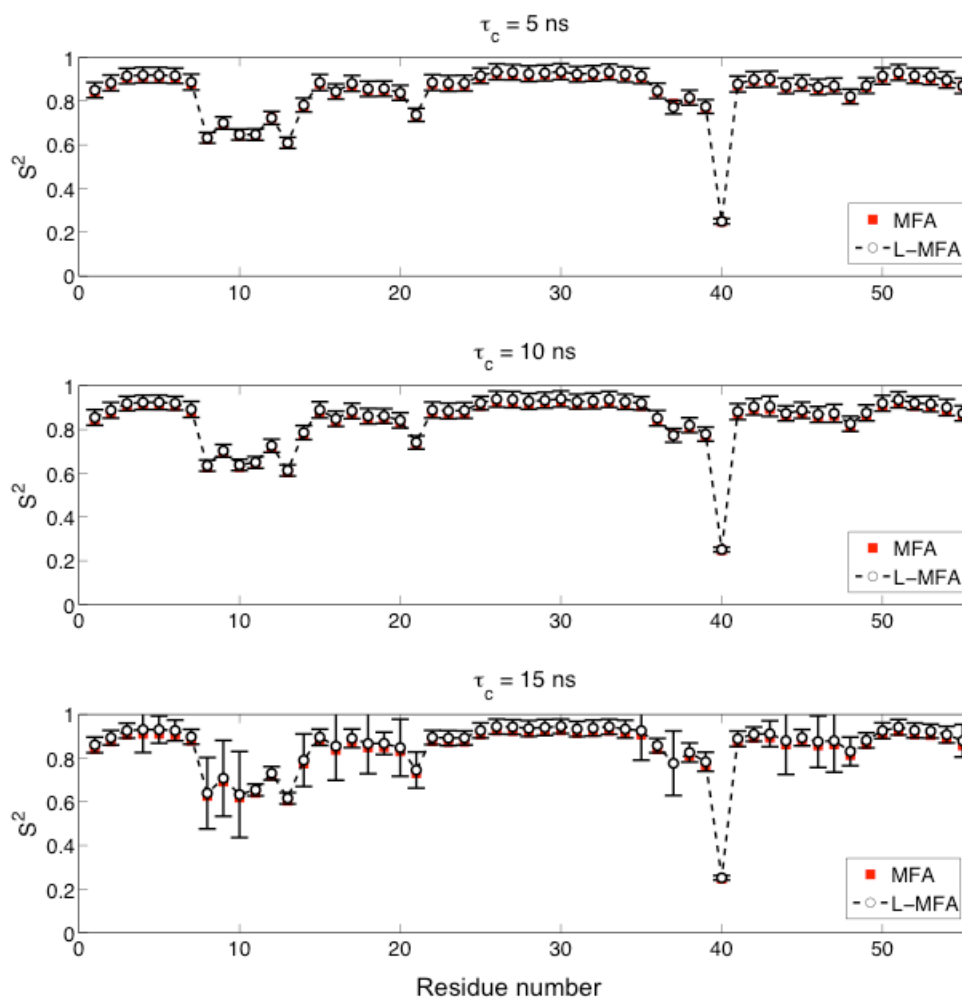

**Figure S5.** Comparison of  $S^2$  order parameters determined by MFA and L-MFA methods with different  $\tau_c$  values of 5 ns, 10 ns and 15 ns (from top to bottom). The error bars were estimated by Monte Carlo simulations with 5% errors for  $R_1$  and  $R_2$  values extracted from the MD trajectory (PDB: 1IGD).



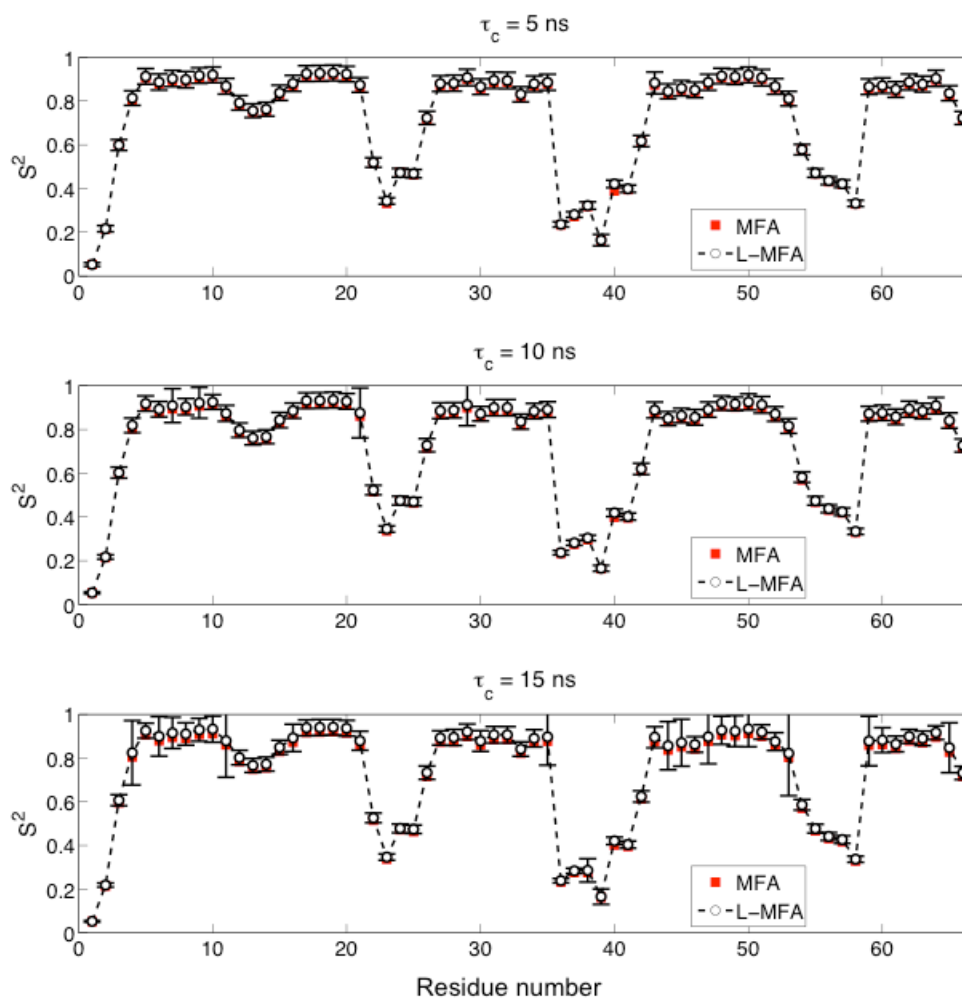

**Figure S6.** Comparison of  $S^2$  order parameters determined by MFA and L-MFA methods with different  $\tau_c$  values of 5 ns, 10 ns and 15 ns (from top to bottom). The error bars were estimated by Monte Carlo simulations with 5% errors for  $R_1$  and  $R_2$  values extracted from the MD trajectory (PDB: 1MJC).

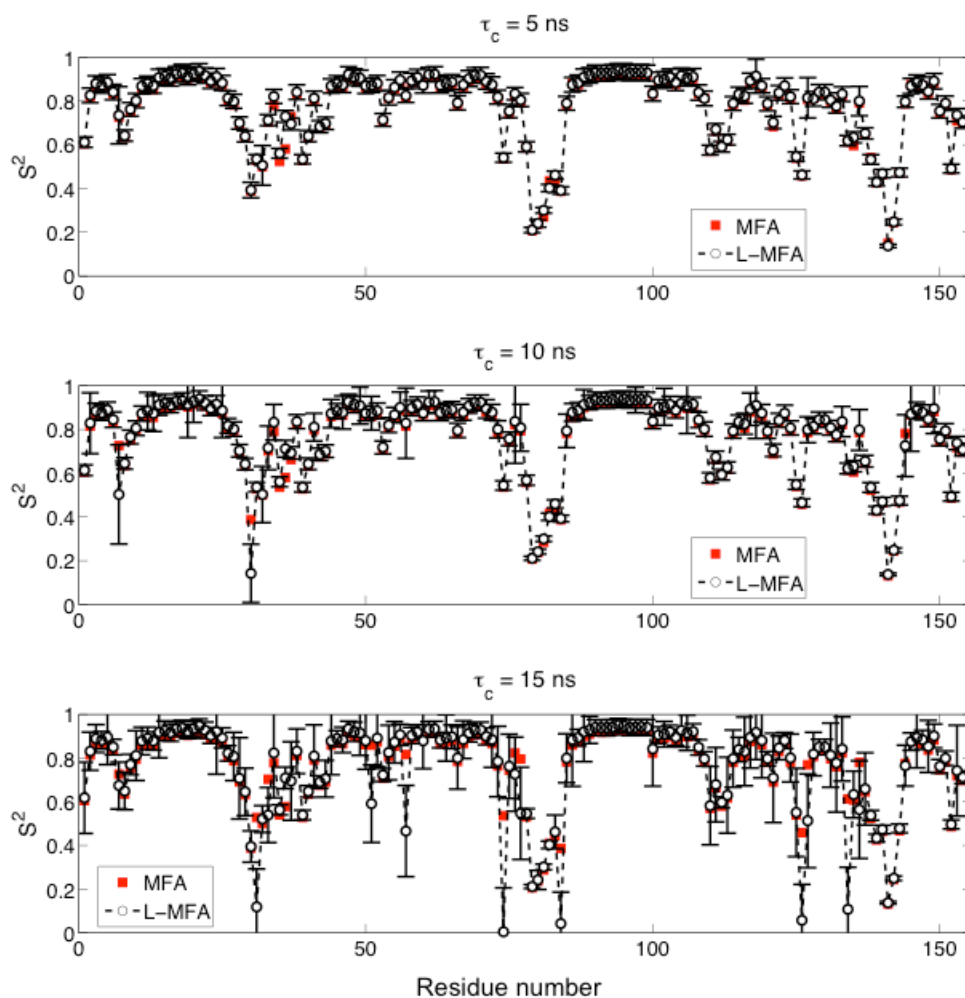

**Figure S7.** Comparison of  $S^2$  order parameters determined by MFA and L-MFA methods with different  $\tau_c$  values of 5 ns, 10 ns and 15 ns (from top to bottom). The error bars were estimated by Monte Carlo simulations with 5% errors for  $R_1$  and  $R_2$  values extracted from the MD trajectory (PDB: 1QST).

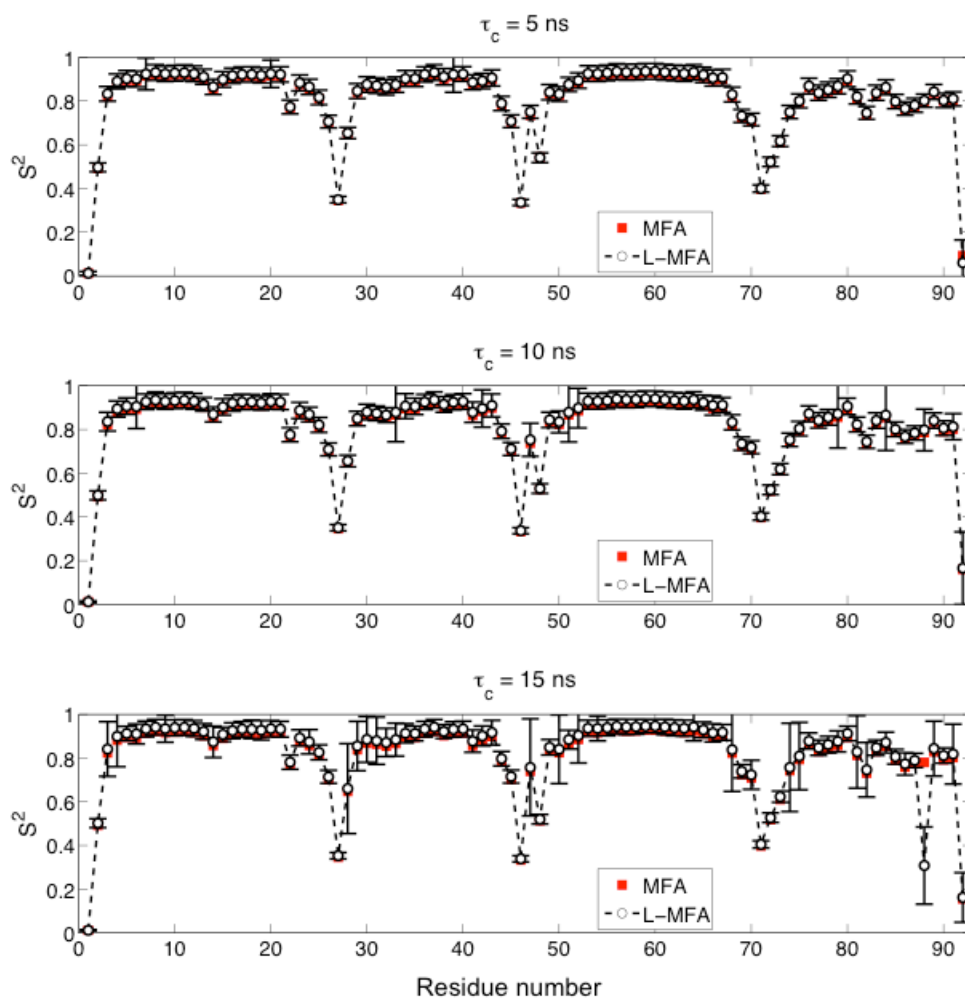

**Figure S8.** Comparison of  $S^2$  order parameters determined by MFA and L-MFA methods with different  $\tau_c$  values of 5 ns, 10 ns and 15 ns (from top to bottom). The error bars were estimated by Monte Carlo simulations with 5% errors for  $R_1$  and  $R_2$  values extracted from the MD trajectory (PDB: 1QZM).

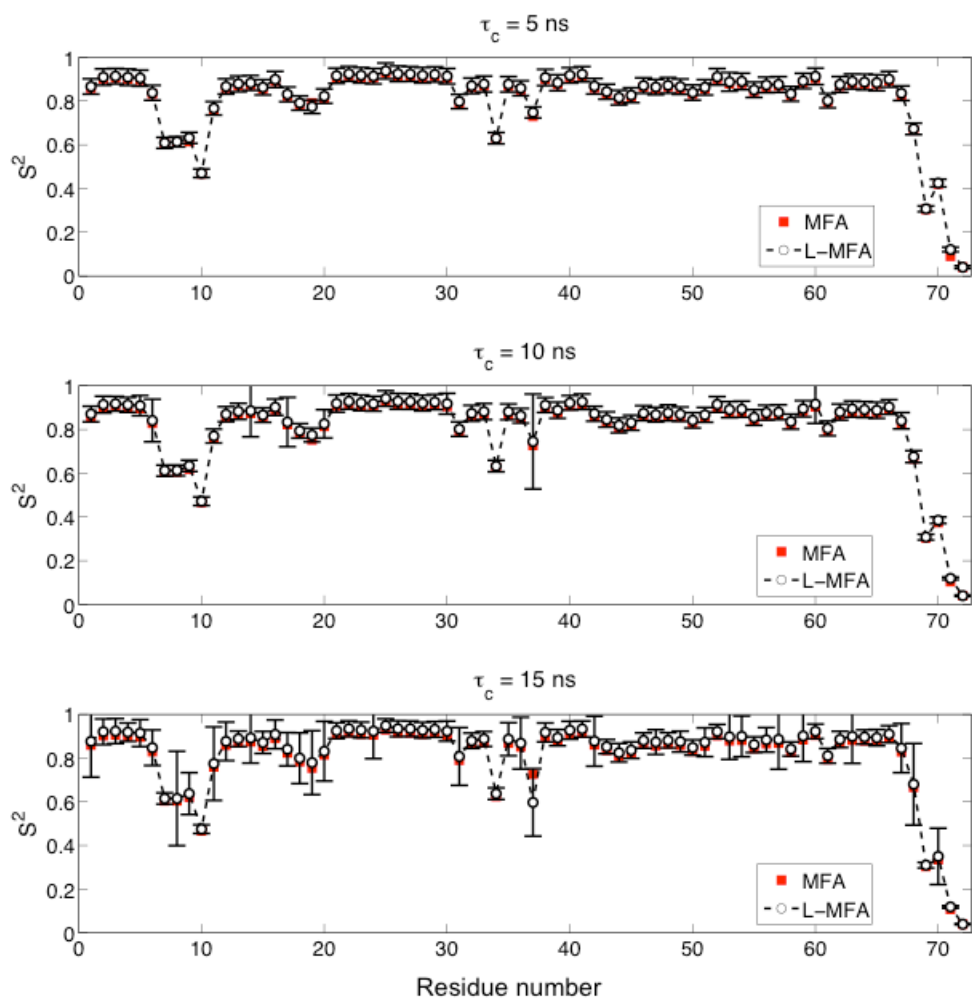

**Figure S9.** Comparison of  $S^2$  order parameters determined by MFA and L-MFA methods with different  $\tau_c$  values of 5 ns, 10 ns and 15 ns (from top to bottom). The error bars were estimated by Monte Carlo simulations with 5% errors for  $R_1$  and  $R_2$  values extracted from the MD trajectory (PDB: 1UBI).

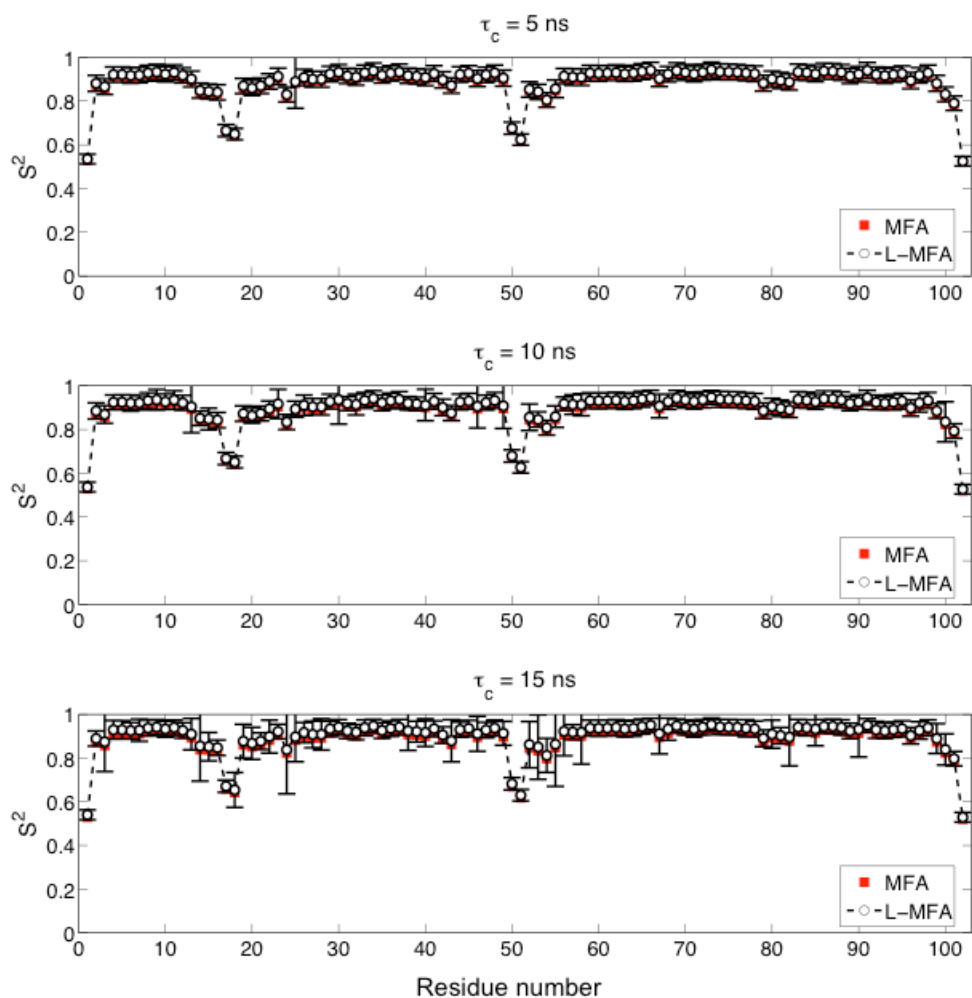

**Figure S10.** Comparison of  $S^2$  order parameters determined by MFA and L-MFA methods with different  $\tau_c$  values of 5 ns, 10 ns and 15 ns (from top to bottom). The error bars were estimated by Monte Carlo simulations with 5% errors for  $R_1$  and  $R_2$  values extracted from the MD trajectory (PDB: 1VYK).

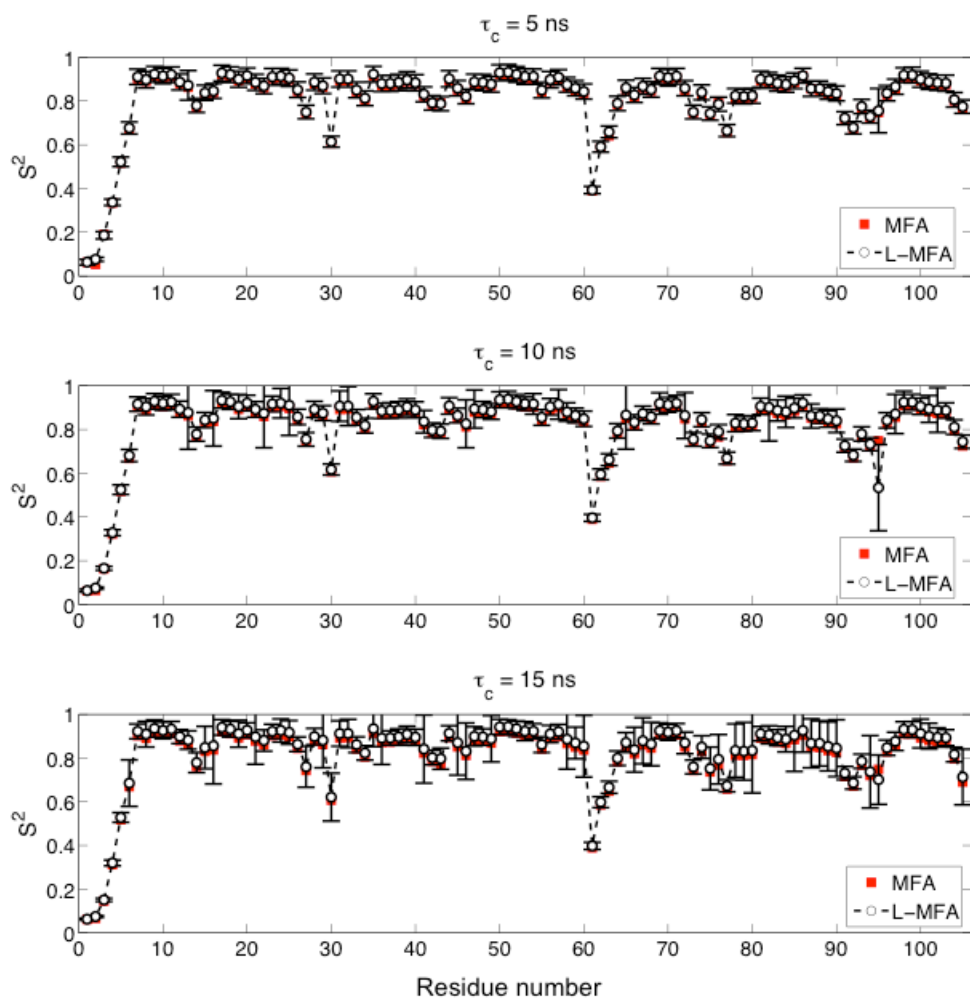

**Figure S11.** Comparison of  $S^2$  order parameters determined by MFA and L-MFA methods with different  $\tau_c$  values of 5 ns, 10 ns and 15 ns (from top to bottom). The error bars were estimated by Monte Carlo simulations with 5% errors for  $R_1$  and  $R_2$  values extracted from the MD trajectory (PDB: 2B02).

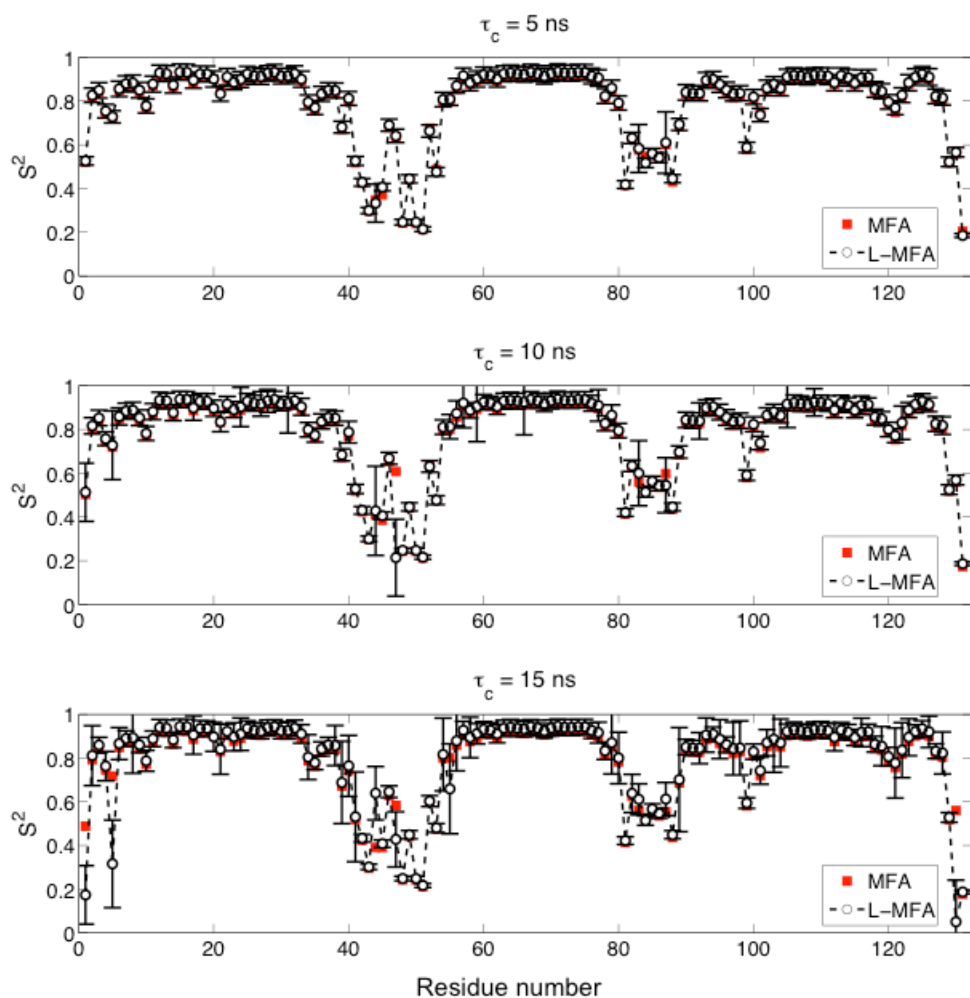

**Figure S12.** Comparison of  $S^2$  order parameters determined by MFA and L-MFA methods with different  $\tau_c$  values of 5 ns, 10 ns and 15 ns (from top to bottom). The error bars were estimated by Monte Carlo simulations with 5% errors for  $R_1$  and  $R_2$  values extracted from the MD trajectory (PDB: 2END).

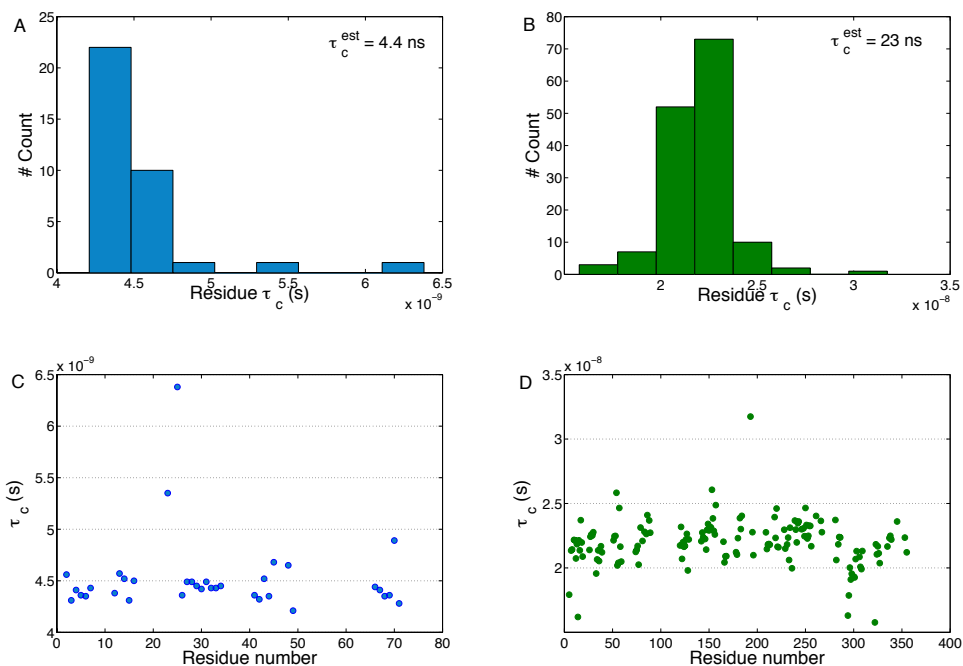

**Figure S13.** Estimation of global tumbling correlation time  $\tau_c$  from  $R_2/R_1$  ratios. Histogram of calculated residue-wise  $\tau_c$  is shown for (A) ubiquitin and (B) AK including only residues belonging to secondary structures according to the DSSP program. The global  $\tau_c$  values were estimated from the residue-wise  $\tau_c$  values averaged over all  $^{15}\text{N}$  sites that are part of well-defined secondary structures, which results in  $\tau_c$  values of 4.4 ns and 23 ns for ubiquitin and AK, respectively. The calculated  $\tau_c$  values from residues in secondary structures are plotted for (C) ubiquitin and (D) AK.



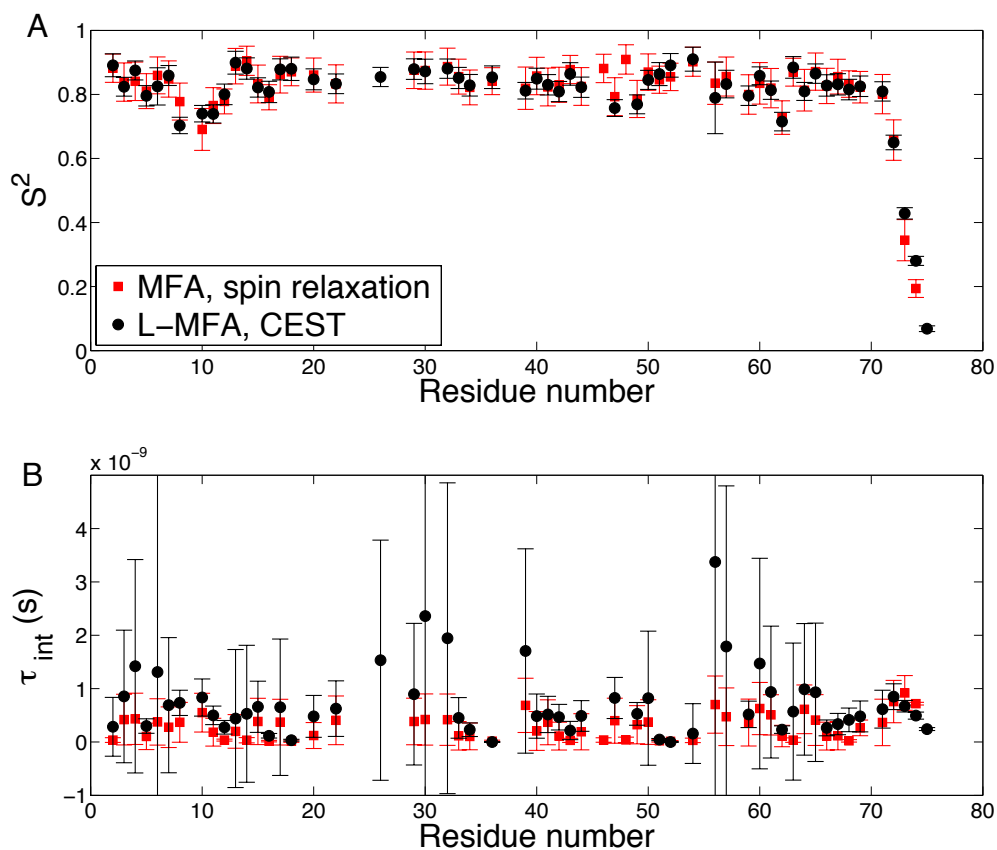

**Figure S14.** Comparison of ubiquitin  $S^2$  order parameters (A) and internal correlation time  $\tau_{\text{int}}$  (B) extracted by different methods.  $\tau_{\text{int}}$  fitted by MFA of  $R_1$ ,  $R_2$  and NOE from spin relaxation experiment (red squares).  $\tau_{\text{int}}$  fitted by L-MFA analysis of CEST-derived  $R_1$  and  $R_2$  (black dots). The error bars are estimated from an analysis of 5% Monte Carlo error on relaxation parameters.

## References

- [1] P. Vallurupalli, G. Bouvignies, L. E. Kay, *J. Am. Chem. Soc.* **2012**, *134*, 8148.
- [2] M. Guenneugues, P. Berthault, H. Desvaux, *J. Magn. Reson.* **1999**, *136*, 118.
- [3] O. Davulcu, P. F. Flynn, M. S. Chapman, J. J. Skalicky, *Structure* **2009**, *17*, 1356.
- [4] F. Delaglio, S. Grzesiek, G. W. Vuister, G. Zhu, J. Pfeifer, A. Bax, *J. Biomol. NMR* **1995**, *6*, 277.
- [5] H. M. McConnell, *J. Chem. Phys.* **1958**, *28*, 430.
- [6] N. A. Lakomek, J. Ying, A. Bax, *J. Biomol. NMR* **2012**, *53*, 209.
- [7] M. Gairi, A. Dyachenko, M. T. Gonzalez, M. Feliz, M. Pons, E. Giralt, *J. Biomol. NMR* **2015**, *62*, 209.
- [8] A. G. Palmer, 3rd, C. D. Kroenke, J. P. Loria, *Methods Enzymol.* **2001**, *339*, 204.
- [9] (a) M. G. Carneiro, J. G. Reddy, C. Griesinger, D. Lee, *J. Biomol. NMR* **2015**, *63*, 237; (b) A. L. Hansen, G. Bouvignies, L. E. Kay, *J. Biomol. NMR* **2013**, *55*, 279.
- [10] (a) N. L. Fawzi, J. F. Ying, R. Ghirlando, D. A. Torchia, G. M. Clore, *Nature* **2011**, *480*, 268; (b) P. Vallurupalli, G. Bouvignies, L. E. Kay, *J. Phys. Chem. B* **2011**, *115*, 14891.
- [11] Y. Gu, D. W. Li, R. Brüschweiler, *J. Chem. Theory Comput.* **2014**, *10*, 2599.
